# Supplementary material
Source: publisher site journal article supplement (https://e-cmh.org/upload/media/cmh-2024-0042-Supplementary-Table-3.pdf)
Supplement: Supplementary file 1 [file cmh-2024-0042-Supplementary-Table-3.pdf]

**Supplementary Table 3.** Clinical information of the patients in the validation datasets

| Variables        | VD1 (PRJNA739257)                                                                                              |       | VD2 (PRJNA909469)                                                                                                                                   |       | VD3 (PRJNA717231)                                                                                                            |      |
|------------------|----------------------------------------------------------------------------------------------------------------|-------|-----------------------------------------------------------------------------------------------------------------------------------------------------|-------|------------------------------------------------------------------------------------------------------------------------------|------|
|                  | Normal                                                                                                         | HCC   | Normal                                                                                                                                              | HCC   | Normal                                                                                                                       | HCC  |
| Sample           | 17                                                                                                             | 17    | 3                                                                                                                                                   | 3     | 4                                                                                                                            | 8    |
| Sex              |                                                                                                                |       |                                                                                                                                                     |       |                                                                                                                              |      |
| Male             |                                                                                                                | 11    | 3                                                                                                                                                   | 3     | 2                                                                                                                            | 6    |
| Female           |                                                                                                                | 6     | 0                                                                                                                                                   | 0     | 2                                                                                                                            | 2    |
| Age              |                                                                                                                | 53±19 | 47±6                                                                                                                                                | 62±21 | 29±4                                                                                                                         | 64±4 |
| Etiology         |                                                                                                                | HBV   |                                                                                                                                                     | HBV   |                                                                                                                              | HBV  |
| BCLC             |                                                                                                                |       |                                                                                                                                                     |       |                                                                                                                              |      |
| Stage A          |                                                                                                                | 6     |                                                                                                                                                     | 0     |                                                                                                                              | 4    |
| Stage B          |                                                                                                                | 1     |                                                                                                                                                     | 0     |                                                                                                                              | 4    |
| Stage C          |                                                                                                                | 4     |                                                                                                                                                     | 0     |                                                                                                                              | 0    |
| Stage D          |                                                                                                                | 5     |                                                                                                                                                     | 3     |                                                                                                                              | 0    |
| Cirrhosis        |                                                                                                                | 9     |                                                                                                                                                     |       |                                                                                                                              |      |
| Metastasis       |                                                                                                                | 9     |                                                                                                                                                     |       |                                                                                                                              |      |
| Race             |                                                                                                                |       | Asian                                                                                                                                               | Asian |                                                                                                                              |      |
| Patient source   | Shenzhen Traditional Chinese Medicine Hospital                                                                 |       | Shenzhen Traditional Chinese Medicine Hospital                                                                                                      |       | King Chulalongkorn Memorial Hospital, Thailand                                                                               |      |
| Sample type      | PBMC                                                                                                           |       | PBMC                                                                                                                                                |       | PBMC                                                                                                                         |      |
| Sample isolation | 1. PB 2 mL collection (EDTA blood)<br>2. PBMCs separation (Ficoll-Paque PREMIUM)<br>3. RNA extraction (TRIzol) |       | 1. PB 8 mL collection EDTA anti-coagulant vacuum angiography)<br>2. PBMCs isolation (density gradient centrifugation)<br>3. RNA extraction (TRIzol) |       | 1. PB 6 mL collection (EDTA blood)<br>2. PBMCs isolation (Percoll PLUS density gradient media)<br>3. RNA extraction (TRIzol) |      |
| Data type        | Bulk RNA-seq                                                                                                   |       | Bulk RNA-seq                                                                                                                                        |       | Bulk RNA-seq                                                                                                                 |      |

Values are presented as number only or mean±standard deviation.

VD, validation dataset; HCC, hepatocellular carcinoma; HBV, hepatitis B virus; PBMC, peripheral blood mononuclear cell; PB, peripheral blood.
